# Supplementary material
Source: publisher figshare collection journal article supplement (https://acs.figshare.com/ndownloader/files/34297372)
Supplement: Supplementary file 1 [file 34297372]

---

Supporting information:

**A demonstration of broadband cavity-enhanced absorption spectroscopy at deep-ultraviolet wavelengths: application to sensitive real-time detection of the aromatic pollutants Benzene, Toluene, and Xylene (BTX)**

Meng Wang<sup>1</sup>, Ravi Varma<sup>2</sup>, Dean S. Venables<sup>3</sup>, Wu Zhou<sup>1</sup>, and Jun Chen<sup>1\*</sup>

1. Shanghai Key Laboratory of Multiphase Flow and Heat Transfer in Power Engineering, School of Energy and Power Engineering, University of Shanghai for Science and Technology, Shanghai, 200093, China

2. Department of Physics, National Institute of Technology Calicut, Calicut, 673601, Kerala, India

3. School of Chemistry and Environmental Research Institute, University College Cork, Cork, Ireland

*\*Corresponding author: Jun Chen (j.chen@usst.edu.cn)*

**Contents**

**Figure S1.** The absorption coefficient of BTX .....S-2

**Figure S2.** The absorption cross-section of Benzene.....S-3

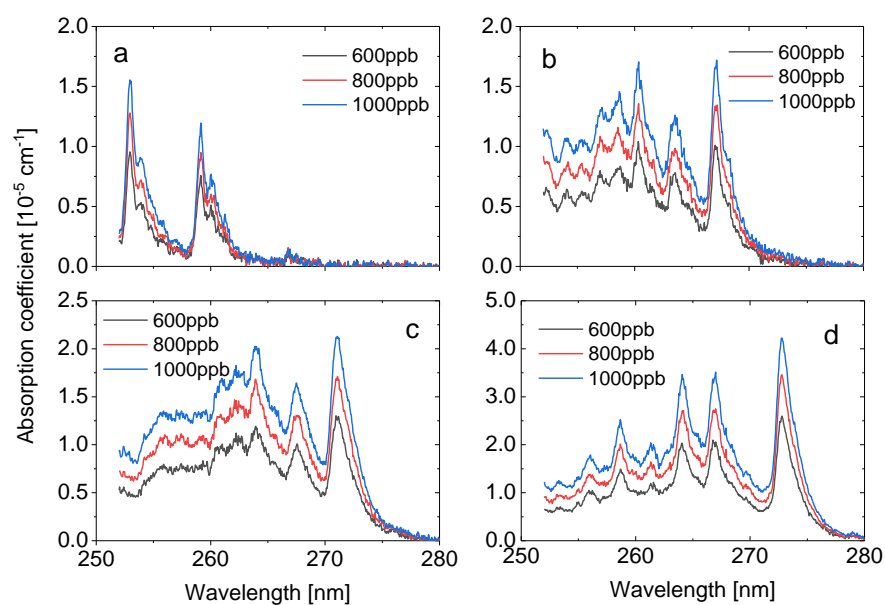

**Figure S1.** The absorption coefficient of BTX at 600, 800 and 1000 ppbv in the range of 250-280 nm. (a) Absorption coefficient of benzene. (b) Absorption coefficient of toluene. (c) Absorption coefficient of m-xylene. (d) Absorption coefficient of p-xylene.

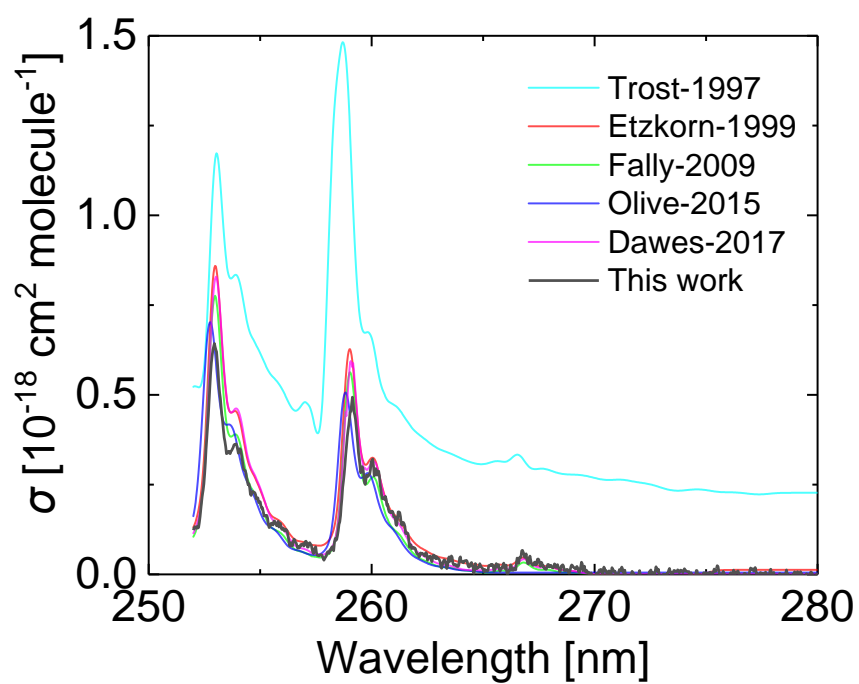

**Figure S2.** Benzene absorption cross-section from this work and recent literature spectrum (convoluted to this work's resolution) on a linear scale.
